# Supplementary material
Source: PubMed Central journal article supplement (PMC3629835)
Supplement: supp_mol.112.083949_Supplementary_Table_1.pdf [file supp_mol.112.083949_Supplementary_Table_1.pdf]

**Title:** Probing the Metabotropic Glutamate Receptor 5 (mGlu5) Positive Allosteric Modulator (PAM) Binding Pocket: Discovery of Point Mutations that Engender a “Molecular Switch” in PAM Pharmacology

**Authors:** Karen J. Gregory, Elizabeth D. Nguyen, Sean D. Reiff, Emma F. Squire, Shaun R. Stauffer, Craig W. Lindsley, Jens Meiler and P. Jeffrey Conn.

**Journal:** Molecular Pharmacology

**Supplementary Table 1: Potency and operational model parameters for glutamate stimulated  $\text{Ca}^{++}$  mobilization at HEK293A-mGlu<sub>5</sub>-wt and mutants in the absence and presence of MPEP.** Data represent mean  $\pm$  s.e.m from 3-6 independent determinations performed in duplicate.

|              | pEC <sub>50</sub> <sup>a</sup> | log $\tau$ <sub>A</sub> <sup>b</sup> | n <sup>c</sup> | E <sub>m</sub> <sup>d</sup> | basal <sup>e</sup> |
|--------------|--------------------------------|--------------------------------------|----------------|-----------------------------|--------------------|
| R5-wt (poly) | 6.49 $\pm$ 0.09                | 0.52 $\pm$ 0.04                      | 3.7 $\pm$ 1.0  | 101.5 $\pm$ 5.3             | 0.6 $\pm$ 2.5      |
| F585I        | 6.31 $\pm$ 0.09                | 0.37 $\pm$ 0.06                      | 4.0 $\pm$ 0.7  | 109.6 $\pm$ 3.8             | 0.8 $\pm$ 0.7      |
| R647A        | 6.11 $\pm$ 0.17                | 0.13 $\pm$ 0.12*                     | 3.0 $\pm$ 0.4  | 167.0 $\pm$ 24.5            | 5.2 $\pm$ 3.1      |
| I650A        | 6.44 $\pm$ 0.11                | 0.57 $\pm$ 0.05                      | 3.7 $\pm$ 0.4  | 104.6 $\pm$ 1.3             | 1.5 $\pm$ 0.6      |
| G651F        | 6.35 $\pm$ 0.10                | 0.37 $\pm$ 0.06                      | 2.5 $\pm$ 0.3  | 114.4 $\pm$ 0.3             | -3.0 $\pm$ 2.9     |
| P654S        | 6.41 $\pm$ 0.03                | 0.46 $\pm$ 0.01                      | 3.1 $\pm$ 0.3  | 100.1 $\pm$ 1.7             | 0.2 $\pm$ 1.7      |
| P654F        | 6.48 $\pm$ 0.03                | 0.44 $\pm$ 0.02                      | 3.2 $\pm$ 0.3  | 106.5 $\pm$ 7.9             | 3.3 $\pm$ 1.3      |
| S657C        | 6.36 $\pm$ 0.07                | 0.41 $\pm$ 0.04                      | 2.4 $\pm$ 0.3  | 111.2 $\pm$ 3.7             | 0.9 $\pm$ 1.2      |
| Y658V        | 6.51 $\pm$ 0.08                | 0.52 $\pm$ 0.04                      | 3.6 $\pm$ 0.8  | 103.8 $\pm$ 2.2             | 1.3 $\pm$ 1.5      |
| P742S        | 5.90 $\pm$ 0.08*               | 0.19 $\pm$ 0.05*                     | 5.0 $\pm$ 1.2  | 119.3 $\pm$ 13.1            | 0.6 $\pm$ 0.9      |
| L743V        | 6.52 $\pm$ 0.11                | 0.52 $\pm$ 0.06                      | 2.6 $\pm$ 0.4  | 95.7 $\pm$ 2.9              | 2.6 $\pm$ 1.3      |
| N746A        | 6.55 $\pm$ 0.06                | 0.56 $\pm$ 0.04                      | 3.8 $\pm$ 0.3  | 98.0 $\pm$ 1.8              | 1.5 $\pm$ 2.2      |
| G747V        | 6.50 $\pm$ 0.10                | 0.50 $\pm$ 0.05                      | 3.5 $\pm$ 0.8  | 102.3 $\pm$ 3.2             | 2.6 $\pm$ 0.4      |
| T779A        | 6.63 $\pm$ 0.06                | 0.57 $\pm$ 0.03                      | 2.3 $\pm$ 0.3  | 108.6 $\pm$ 1.8             | 1.9 $\pm$ 1.6      |
| T780A        | 6.68 $\pm$ 0.02                | 0.58 $\pm$ 0.03                      | 2.4 $\pm$ 0.6  | 104.1 $\pm$ 5.4             | 0.8 $\pm$ 0.5      |
| W784A        | 6.15 $\pm$ 0.14                | 0.35 $\pm$ 0.05                      | 3.7 $\pm$ 0.3  | 103.9 $\pm$ 1.3             | 2.9 $\pm$ 1.2      |
| V788A        | 6.32 $\pm$ 0.06                | 0.38 $\pm$ 0.04                      | 3.0 $\pm$ 0.6  | 107.4 $\pm$ 3.6             | 0.8 $\pm$ 0.8      |
| F792A        | 6.64 $\pm$ 0.07                | 0.61 $\pm$ 0.09                      | 2.5 $\pm$ 0.3  | 107.0 $\pm$ 6.9             | -0.4 $\pm$ 0.9     |
| S806A        | 6.66 $\pm$ 0.04                | 0.58 $\pm$ 0.05                      | 2.0 $\pm$ 0.2  | 102.4 $\pm$ 4.5             | 3.2 $\pm$ 0.2      |
| S808A        | 6.76 $\pm$ 0.08                | 0.71 $\pm$ 0.07                      | 3.0 $\pm$ 0.5  | 101.8 $\pm$ 0.5             | 1.5 $\pm$ 0.8      |
| S808T        | 6.72 $\pm$ 0.06                | 0.71 $\pm$ 0.06                      | 2.8 $\pm$ 0.2  | 103.1 $\pm$ 1.6             | 1.0 $\pm$ 1.1      |
| A809V        | 6.28 $\pm$ 0.23                | 0.38 $\pm$ 0.07                      | 3.0 $\pm$ 0.6  | 110.1 $\pm$ 4.9             | -1.4 $\pm$ 1.7     |
| A809G        | 6.15 $\pm$ 0.14                | 0.31 $\pm$ 0.08                      | 3.3 $\pm$ 0.4  | 115.2 $\pm$ 8.0             | 1.2 $\pm$ 1.1      |
| T810A        | 6.40 $\pm$ 0.05                | 0.36 $\pm$ 0.04                      | 2.1 $\pm$ 0.1  | 111.2 $\pm$ 4.1             | 1.5 $\pm$ 0.7      |
| C815A        | 6.22 $\pm$ 0.06                | 0.36 $\pm$ 0.04                      | 4.5 $\pm$ 0.5  | 100.5 $\pm$ 0.5             | 0.7 $\pm$ 0.6      |

\* denotes significantly different from wild type value, p<0.05, one-way ANOVA, Dunnett’s post-test.

<sup>a</sup> negative logarithm of the concentration of agonist that elicits a half maximal response

<sup>b</sup> logarithm of the coupling efficiency of glutamate.

<sup>c</sup> the transducer function that links occupancy to response

<sup>d</sup> the maximal possible system response

<sup>e</sup> basal denotes the baseline level (ligand-independent) of the system response
